# Supplementary material
Source: publisher figshare collection journal article supplement (https://sage.figshare.com/ndownloader/files/15778535)

## ONLINE APPENDIX:

### Cross-border friendships and collective European identity: A longitudinal study

Gabriele Prati, Department of Psychology, University of Bologna, Bologna, Italy

Elvira Cicognani, Department of Psychology, University of Bologna, Bologna, Italy

Davide Mazzoni, Department of Psychology, University of Milano-Bicocca, Milano, Italy

Figure A1: Scatterplot of the unstandardized predicted values of identification with EU scores against cross-border friendships.

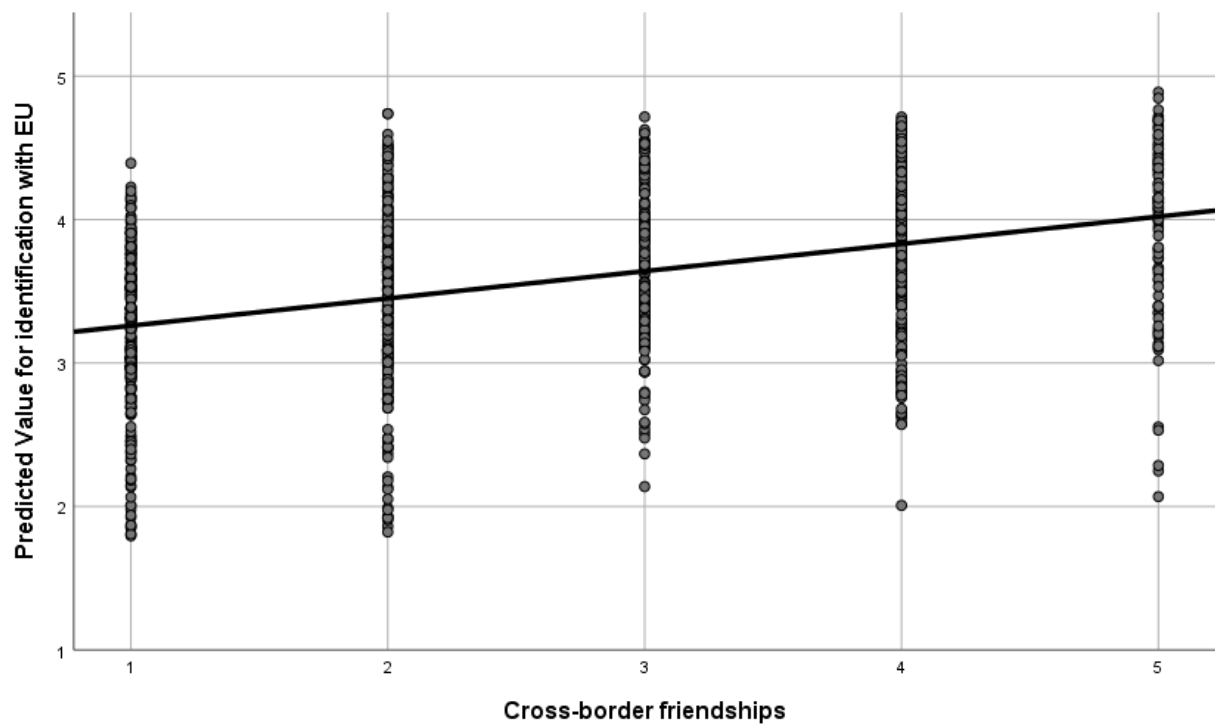

Figure A2: Scatterplot of the unstandardized predicted values of attitudes toward EU scores against cross-border friendships.

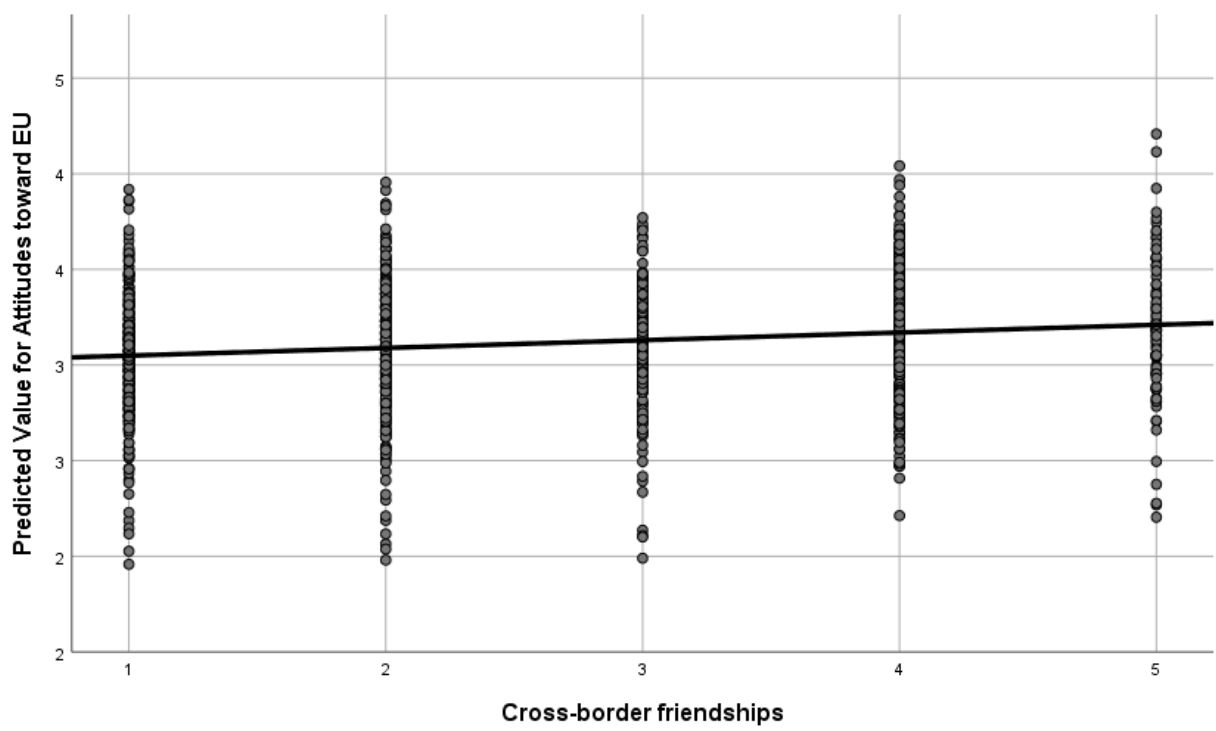

Figure A3: Scatterplot of the unstandardized predicted values of opinions about EU scores against cross-border friendships.

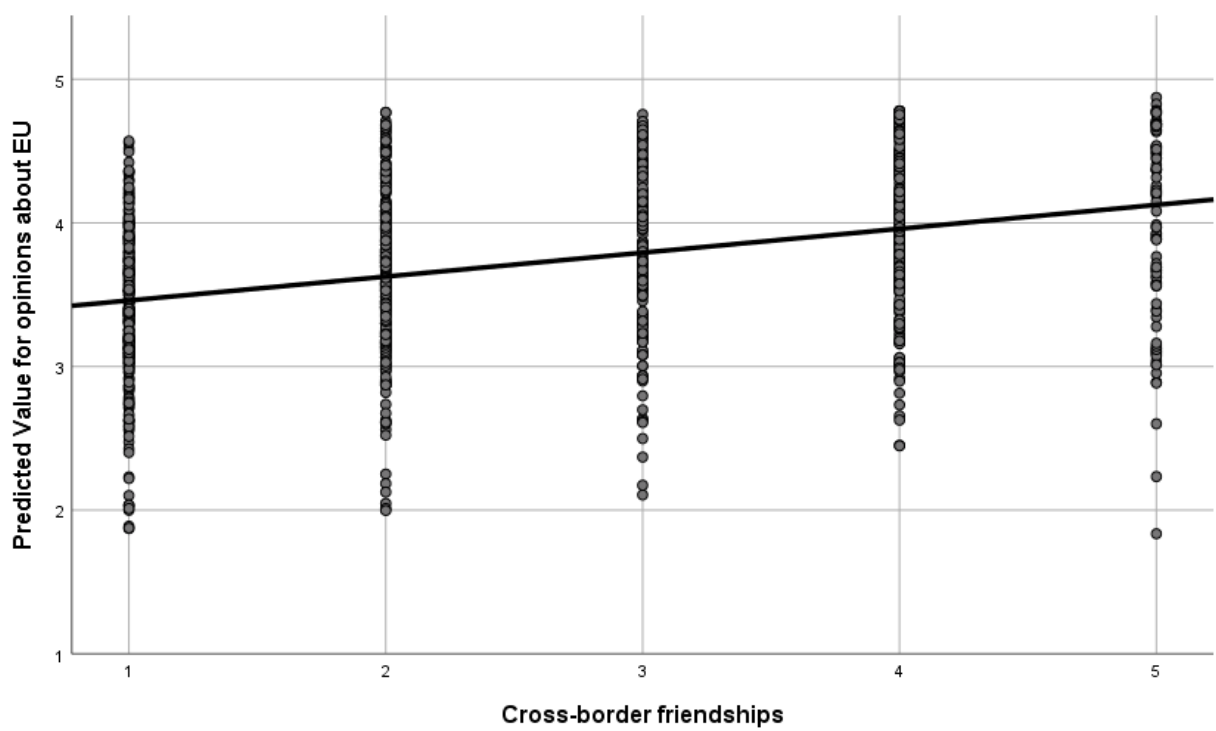

Figure A4: Scatterplot of the unstandardized predicted values of trust in the EU scores against cross-border friendships

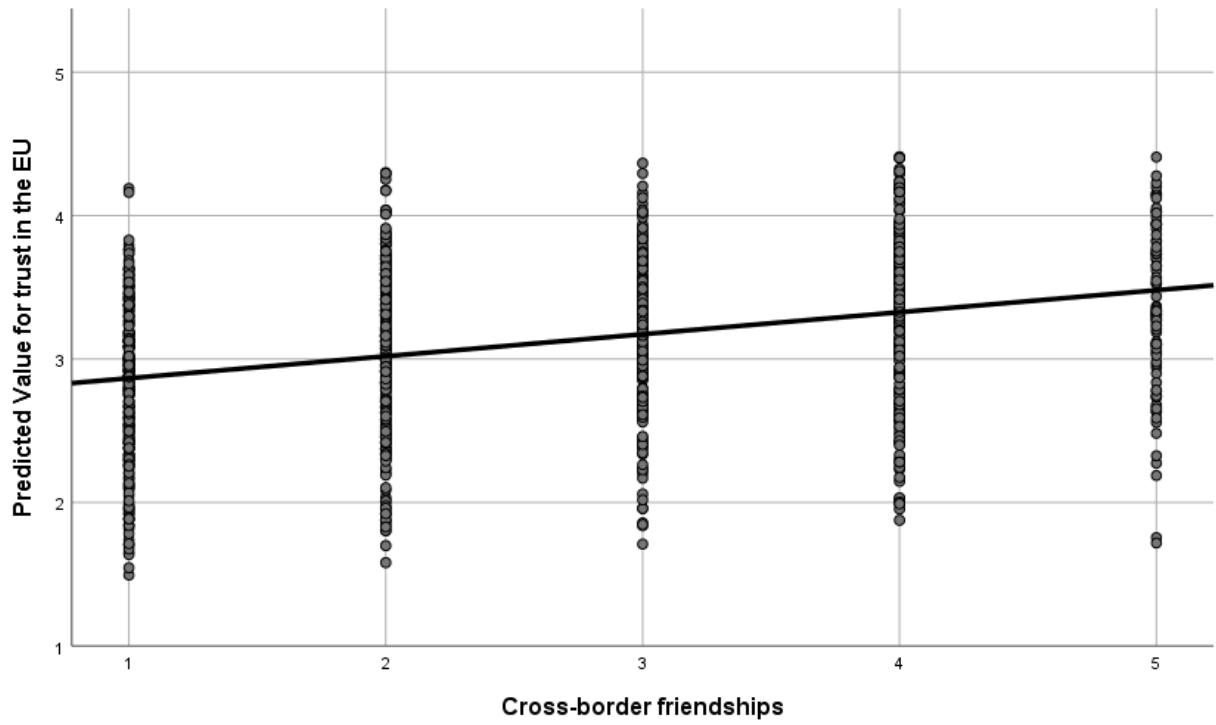

Figure A5: Scatterplot of the unstandardized predicted values of political alienation about EU scores against cross-border friendships

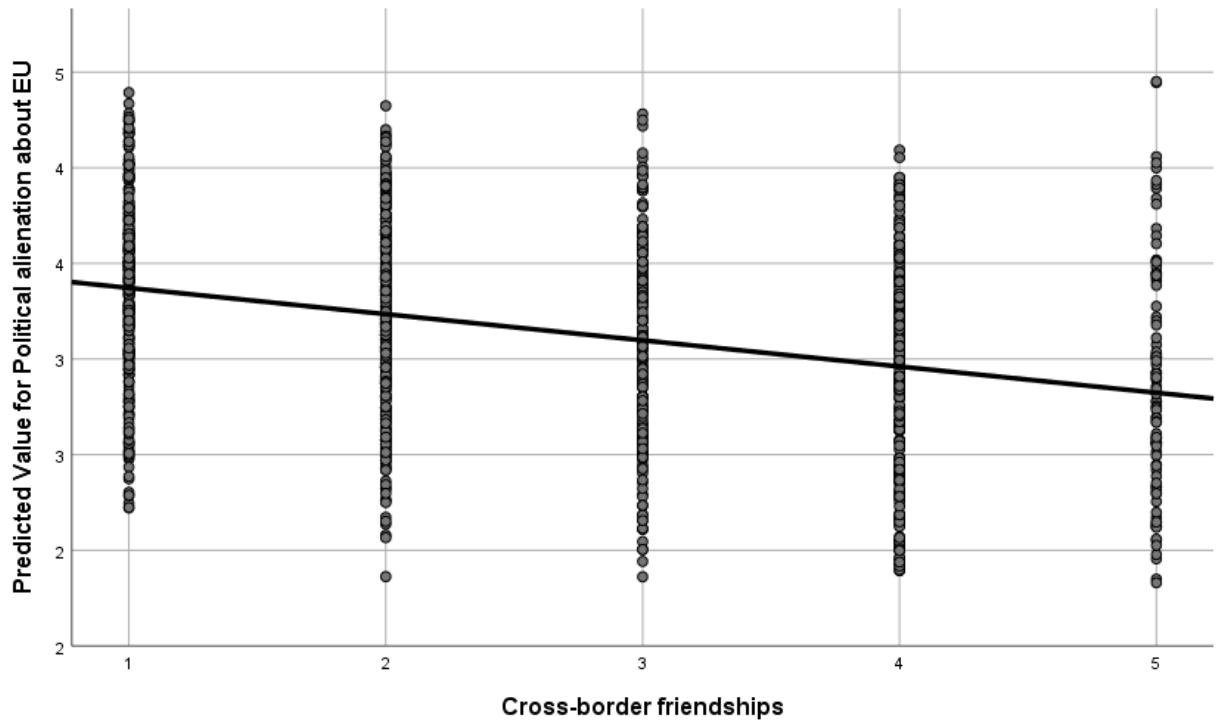

Supplement: Supplementary file 1 [file 15778535]
